# Supplementary material for: Chronic Voluntary Ethanol Consumption Induces Favorable Ceramide Profiles in Selectively Bred Alcohol-Preferring (P) Rats
Source: PubMed Central journal article supplement (PMC4583526; doi:10.1371/journal.pone.0139012), 2015-09-25

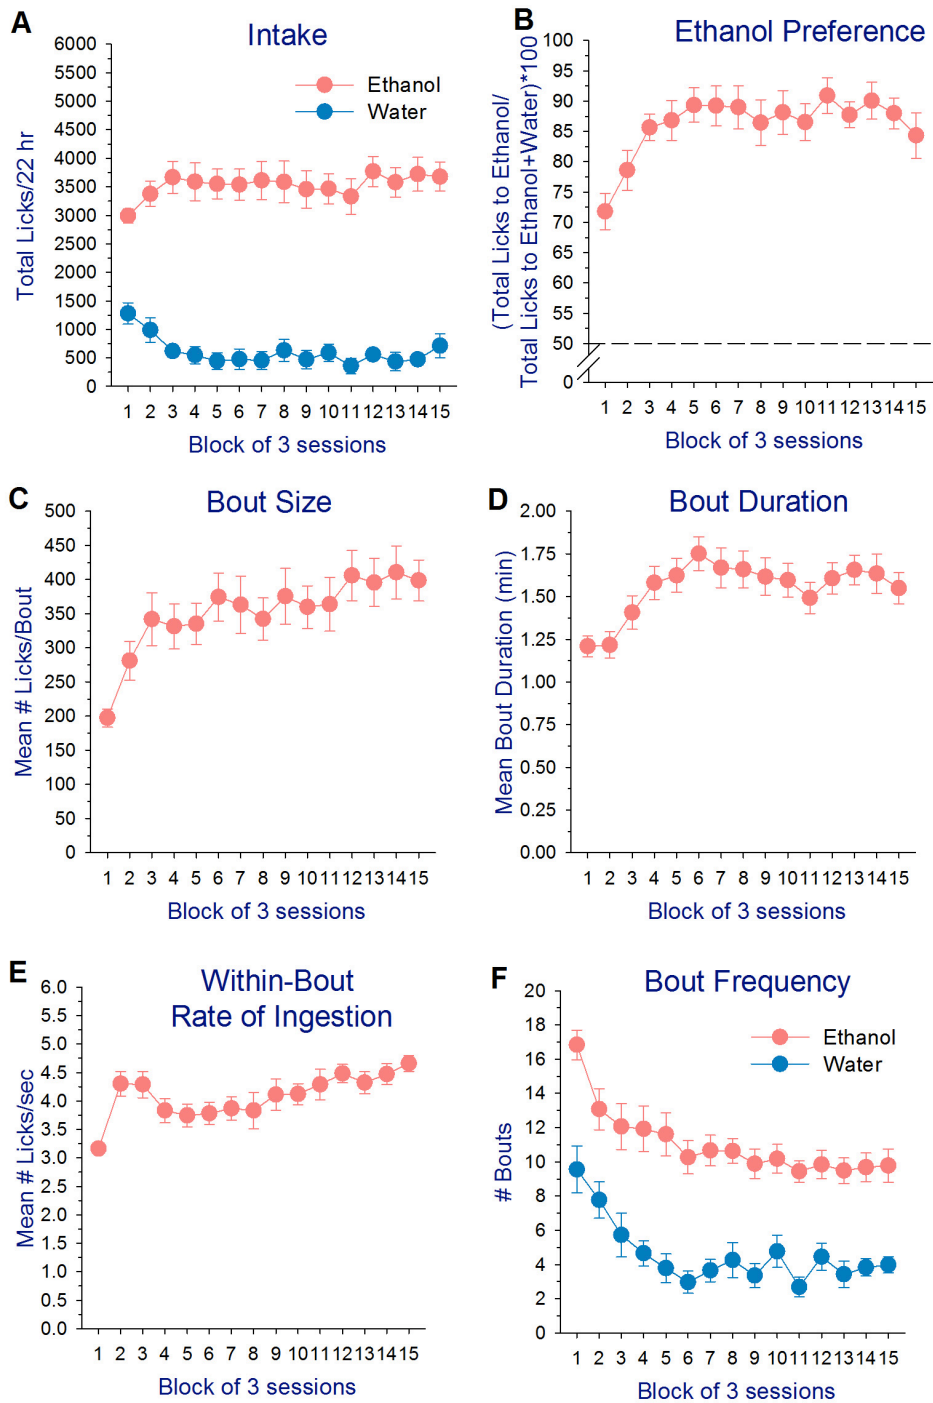

Supplement: pone.0139012.s001.pdf [file pone.0139012.s001.pdf]
