# Supplementary material for: Chronic Voluntary Ethanol Consumption Induces Favorable Ceramide Profiles in Selectively Bred Alcohol-Preferring (P) Rats
Source: PubMed Central journal article supplement (PMC4583526; doi:10.1371/journal.pone.0139012), 2015-09-25
Supplement: pone.0139012.s002.pdf [file pone.0139012.s002.pdf]

## **S1 Appendix**

*Sptlc1* - serine palmitoyltransferase

*Cers1-6* - ceramide synthase

*Smpd1-3* - sphingomyelinase

*Asah1-2* - acid ceramidase

*Acer1-3* - alkaline ceramidase

*Sgpl1* - S1P lyase
